# Supplementary material for: Gamma-Linolenic and Stearidonic Acids Are Required for Basal Immunity in Caenorhabditis elegans through Their Effects on p38 MAP Kinase Activity
Source: PLoS Genet. 2008 Nov 21;4(11):e1000273. doi: 10.1371/journal.pgen.1000273 (PMC2581601; doi:10.1371/journal.pgen.1000273)
Supplement: Table S1 — Analysis of 50 stress- and infection-response genes. q-RT PCR analysis of stress- and infection-response gene expression in uninfected and P. aeruginosa-infected wild-type, fat-3(wa22), sek-1(km4), pmk-1(km25), daf-16(mu86) and sma-6(wk7) animals. Data are depicted as Ct values relative to wild-type±s.e.m. (Ctwild-type – mutant) and represent average values of three independent experiments. Student's t-test was used to determine significant differences in gene expression. (0.04 MB XLS) [file pgen.1000273.s007.xls]

## Sheet: Sheet1
	Basal expression			Gene expression relative to WT on OP50-1
			WT			fat-3			sek-1			pmk-1			daf-16			sma-6
	Sequence Id	Gene Name	WT - WT			WT - fat-3(wa22)			WT - sek-1(km4)			WT - pmk-1(km25)			WT - daf-16(mu86)			WT - sma-6(wk7)
			Ct	Std Err		Ct	Std Err		Ct	Std Err		Ct	Std Err		Ct	Std Err		Ct	Std Err
Genes with decreased basal expression in the fat-3(wa22) mutant relative to wild-type	Y22F5A.5	lys-2	0	0.192209		-1.44167	0.188378		-7.32833	0.159478		-5.99583	0.2875		-0.251667	0.0808977		-2.065	0.323797
	F49F1.1	F49F1.1	0	0.148137		-2.575	0.538194		-6.695	1.14944		-4.94583	0.3375		-0.685	0.382376		-3.375	0.257056
	ZK6.10	dod-19	0	0.501941		-1.675	0.259139		-3.395	0.211844		-3.24583	0.1625		-0.885	0.117804		-2.055	0.0788106
	C02A12.4	lys-7	0	0.391933		-1.26944	0.363698		-2.69667	0.102686		-0.579167	1.4625		-3.01833	0.4682		0.909444	0.450335
	F38A5.3	lec-11	0	0.439068		-3.61444	1.08044		-2.501	0.282627		-1.53517	1.2125		-0.457667	0.210792		1.61433	0.413212
	T01D3.6	T01D3.6	0	0.55252		-1.775	0.379235		-1.495	0.154524		-0.345833	0.5625		-0.451667	0.338936		0.808333	0.0750555
	ZK6.11	ZK6.11	0	0.686982		-1.94167	0.414913		-5.16167	0.760402		-3.64583	0.7625		-1.50833	0.519615		-2.78833	0.330807
	F08G5.6	F08G5.6	0	0.25658		-1.84167	0.73631		-7.595	0.705053		-2.8125	1.7625		0.381667	0.309641		0.345	0.0585947
	F35E8.8	gst-38	0	0.340343		-1.475	0.142156		-2.02833	0.433833		-0.7125	0.2625		0.915	0.115902		1.18833	0.371768
	F35E12.7	dct-17	0	0.594652		-1.54167	0.23199		-4.46167	0.344787		-4.69583	1.0125		-1.71833	0.198578		-2.08833	0.245832
	F35E12.8	F35E12.8	0	0.340343		-1.40833	0.494624		-2.32833	0.57955		-1.9125	0.6375		-0.118333	0.291909		-1.83167	0.609517
	T07C4.4	spp-1	0	0.202073		-1.055	0.0490748		-0.485	0.0663953		1.7875	0.2625		0.281667	0.433449		0.791667	0.133208
Genes with increased basal exression in the fat-3(wa22) mutant relative to wild-type	F32A5.5	dod-4	0	0.192209		0.991667	0.187639		-0.35	0.470224		-0.0958334	0.5875		-0.421667	0.25208		-0.298333	0.531131
	K05F1.10	K05F1.10	0	0.164148		0.958333	0.123322		-0.116667	0.23094		1.22083	0.6625		-1.035	0.626773		-0.065	0.232116
	F28D1.5	thn-2	0	0.537225		2.625	0.23199		-0.35	0.0333333		1.40417	0.5125		-1.655	0.885557		-0.198333	0.423596
	C52E4.1	cpr-1	0	0.738429		3.25833	0.303109		0.283333	0.585946		2.12083	1.1625		-1.535	0.546057		-0.465	0.627597
	R08H2.1	dhs-23	0	0.277389		2.85833	1.11924		2.01667	0.881917		4.67083	1.3125		5.36833	0.861239		3.59167	0.277028
	ZK39.6	ZK39.6	0	0.160728		2.75833	1.18095		0.416667	0.185592		2.2875	1.5625		1.76833	0.692949		0.648333	0.413374
	C17C3.4	ins-11	0	0.292973		3.625	0.487553		0.683333	0.491031		-0.3125	0.2625		2.10167	0.52362		4.39167	1.14094
	C06G4.2	clp-1	0	0.174005		1.625	0.324786		0.316667	0.11547		1.05417	1.1625		-1.90278	0.220977		-0.298333	0.764918
	B0213.6	nlp-31	0	0.420648		0.991667	0.336134		0.05	0.266667		-2.02917	1.2125		-0.391667	0.269093		-0.898333	0.375337
	F55G11.2	F55G11.2	0	0.0866025		2.19167	0.458788		1.41667	1.14649		-3.7125	0.0375		-1.70833	0.195988		-1.575	2.07877
Genes with wild-type basal expression in the fat-3(wa22) mutant	C17G10.5	lys-8	0	0.246644		0.591667	0.0794949		-1.92833	0.0959745		-1.5125	0.2375		-1.61833	0.542719		-1.14167	0.663132
	Y22F5A.4	lys-1	0	0.125831		-0.458333	0.36238		-2.91167	0.335476		-2.1625	0.1625		-0.501667	0.176667		-1.59167	0.253136
	ZK1251.2	ins-7	0	0.866186		0.858333	0.352668		1.54333	0.45322		-0.729167	0.4875		-1.61833	0.289041		-0.975	0.35788
	C05A9.1	pgp-5	0	0.404145		0.108333	0.324786		-3.14	0.181865		-1.6625	0.9625		2.065	1.03591		0.241667	0.216205
	C09F12.1	clc-1	0	0.390512		-0.675	0.253722		-0.928333	0.243333		-1.1625	0.1875		-1.085	0.505074		-1.44167	0.422387
	C02F5.8	tsp-1	0	0.488478		-0.341667	0.487553		-1.76167	0.711407		-2.72917	0.7125		-3.985	0.571732		-1.875	0.566343
	F40F8.7	pqm-1	0	0.229129		0.391667	0.0794949		-0.995	0.312143		-0.8125	0.0375		-0.918333	0.202183		-0.641667	0.424356
	F44G3.6	skr-3	0	0.496935		-0.141667	0.0682113		-0.828333	0.210792		-1.09583	0.0875		-0.585	0.225561		-0.608333	0.418688
	F55G11.5	dod-22	0	0.567401		0.89	0.480957		-2.66167	0.872983		-0.279167	0.8625		0.681667	1.32748		0.791667	0.724623
	K08F4.7	gst-4	0	0.220479		0.491667	0.487553		-1.205	0.775314		-0.195833	0.3875		0.215	0.0233333		-0.908333	0.389401
	R03D7.6	gst-5	0	0.15		0.458333	0.197027		0.671667	0.290765		0.8375	0.0875		-0.451667	0.321265		0.291667	0.49438
	Y40D12A.2	Y40D12A.2	0	0.332081		0.0916667	0.392906		-0.828333	0.162583		0.104167	0.1125		0.381667	0.115902		0.258333	0.397171
	C49G7.5	C49G7.5	0	0.678847		-0.308333	2.04666		-0.971667	1.06667		-1.5625	2.1125		-1.29	0.12413		-5.375	0.190526
	C55B7.4	dod-12; acdh-1	0	0.334581		-0.24	0.427444		2.24333	0.528275		-4.12917	3.3125		1.14833	1.03365		0.243333	0.33775
	F21F8.4	F21F8.4	0	0.365529		0.79	0.719713		-1.66167	0.692411		-1.37917	1.0625		-0.251667	0.149778		3.86833	0.360185
	F28A12.4	F28A12.4	0	0.612599		0.925	0.385771		1.905	0.366803		1.21	0.42		1.015	0.367257		1.79167	0.566049
	C32H11.4	C32H11.4	0	0.608505		0.391667	0.620652		-1.595	0.154524		-1.29583	0.0875		-0.218333	0.124231		-0.541667	0.626693
	CD4.2	crn-2	0	0.479873		0.26	0.183901		0.905	0.156667		1.15417	0.6625		0.515	0.376667		0.791667	0.509542
	C41H7.7	clec-3	0	0.548483		0.625	0.95884		-1.56167	0.713123		-5.5625	2.6875		1.24833	0.0959745		-3.075	0.166233
	F27C8.4	spp-18	0	0.356293		0.158333	0.22837		-1.02833	0.159478		-0.445833	0.1625		-1.01833	0.0953939		0.258333	0.0712585
	F28F8.2	acs-2	0	0.816667		0.56	1.28081		1.23833	0.627597		-0.245833	3.7625		-0.451667	0.184059		3.39167	1.36258
	H22K11.1	asp-3	0	0.319287		0.0583333	0.287591		-0.695	0.269959		-1.57917	0.6375		-0.251667	0.470567		-0.208333	0.492014
	K08C7.5	fmo-2	0	0.416667		1.09167	0.68774		-6.595	0.831191		-4.67917	0.4625		-5.585	1.48106		-2.94167	0.536936
	Y54G2A.6	clec-85	0	0.0440959		-0.00833333	0.255359		-5.26167	0.261173		-3.09583	0.3875		-0.885	0.367711		-0.775	0.727835
	K08E7.7	cul-6	0	0.480451		0.391667	0.35424		0.471667	0.377109		-0.4625	0.4125		-0.618333	0.442957		-0.00833333	0.257056
	C23G10.11	C23G10.11	0	0.516667		0.13	0.197027		-1.56167	0.400541		-2.77917	1.8625		-4.21833	0.441072		-1.54167	0.421466
	T10H4.12	cpr-3	0	0.541859		-0.775	0.891433		-1.12833	1.06233		-0.879167	2.9625		-1.55167	0.423596		-1.475	0.686351
	C47B2.8	prx-11	0	0.275379		0.358333	0.217147		1.205	0.20108		0.7375	0.3125		-0.0183333	0.178543		0.225	0.701166
	Infection response			Gene expression relative to WT on PA14
			WT			fat-3			sek-1			pmk-1			daf-16			sma-6
	Gene Id	Gene Name	WT PA14 - WT PA14			WT PA14 - fat-3 PA14			WT PA14 - sek-1 PA14			WT PA14 - pmk-1 PA14			WT PA14 - daf-16 PA14			WT PA14 - sma-6 PA14
			Ct	Std Err		Ct	Std Err		Ct	Std Err		Ct	Std Err		Ct	Std Err		Ct	Std Err
Genes with decreased basal expression in the fat-3(wa22) mutant relative to wild-type	Y22F5A.5	lys-2	0	0.3907		0.81	0.289156		-5.97944	0.129786		-3.79028	0.7875		1.54056	0.406462		1.325	0.0722222
	F49F1.1	F49F1.1	0	0.176536		-0.494444	0.216667		-8.85944	0.399389		-8.72361	0.4875		-1.14944	0.713357		0.548333	1.66845
	ZK6.10	dod-19	0	0.480796		0.505556	0.358624		-0.679445	0.157621		-1.07361	0.0375		-0.349445	0.178543		-0.818334	0.271691
	C02A12.4	lys-7	0	1.01253		-1.99167	0.0166667		-2.59667	1.0105		-0.1875	0.4125		-4.22333	1.22701		0.0955558	3.41318
	F38A5.3	lec-11	0	0.880211		0.442111	0.288675		-2.40589	0.429936		-1.62006	0.6375		-1.02922	0.309103		2.319	2.74075
	T01D3.6	T01D3.6	0	0.418395		0.572222	0.50525		-1.01278	0.676888		0.0263887	0.1375		1.57389	0.330807		2.28167	2.1328
	ZK6.11	ZK6.11	0	0.745889		0.872222	0.449382		-4.12611	0.368118		-3.15694	0.9875		0.540555	0.315331		-1.44167	0.146038
	F08G5.6	F08G5.6	0	0.981319		0.183333	0.425245		-8.86833	0.286667		-4.97917	1.7125		1.785	0.230675		4.615	1.63239
	F35E8.8	gst-38	0	1.16604		1.11667	0.510718		-0.281667	0.501509		1.05417	0.1125		2.62833	0.178543		7.215	5.04888
	F35E12.7	dct-17	0	1.14207		0.34	0.510174		-3.27944	0.433025		-2.74028	0.5375		1.45056	0.390142		6.35833	4.46261
	F35E12.8	F35E12.8	0	1.04652		0.416667	0.58476		-3.06833	0.219494		-4.0625	0.7375		0.718333	0.432294		2.625	2.30163
	T07C4.4	spp-1	0	0.642424		-0.416667	0.549495		0.265	0.337244		1.7875	0.3875		-1.03833	0.194622		-0.0516667	1.01696
Genes with increased basal exression in the fat-3(wa22) mutant relative to wild-type	F32A5.5	dod-4	0	1.2036		0.0722221	0.808462		-0.802778	0.313692		-0.423611	1.1875		-1.77944	0.447077		1.805	1.56475
	K05F1.10	K05F1.10	0	0.233449		0.36	0.464579		-0.113889	0.283945		1.79861	0.2125		1.15278	0.2848		3.205	3.53314
	F28D1.5	thn-2	0	0.242209		2.67222	0.894583		-0.302778	0.311024		1.92639	0.4625		-1.34611	0.595343		1.27167	1.23912
	C52E4.1	cpr-1	0	0.837246		0.69	0.640529		-0.280556	0.492513		3.36528	0.5125		-1.25722	0.346554		3.205	3.42821
	R08H2.1	dhs-23	0	0.279149		2.22778	0.377492		1.31944	0.729773		1.66528	0.2125		3.87611	0.354793		8.88167	7.3945
	ZK39.6	ZK39.6	0	0.274241		2.25	0.180278		-0.0916667	0.104416		1.6375	0.6625		0.865	0.426732		8.205	6.89566
	C17C3.4	ins-11	0	0.822724		0.82	1.24175		1.60833	0.347711		0.2875	0.7125		2.83167	0.640217		9.715	6.42021
	C06G4.2	clp-1	0	0.257945		0.405556	0.526255		-0.369444	0.16604		-0.340278	1.5625		-0.640556	0.638344		4.54833	4.1804
	B0213.6	nlp-31	0	0.185987		0.227778	0.982768		-0.0805555	0.460148		-1.63472	0.4125		0.0427778	0.531131		1.87167	1.46718
	F55G11.2	F55G11.2	0	1.23769		0.62	0.192209		1.775	0.467039		-2.5625	0.7375		1.165	0.142945		6.57167	4.56182
Genes with wild-type basal expression in the fat-3(wa22) mutant	C17G10.5	lys-8	0	0.426468		0.0416667	0.220479		-4.91	0.260256		-3.8875	0.5875		-1.32333	0.364981		-2.14333	0.0296273
	Y22F5A.4	lys-1	0	0.140188		0.075	0.109291		-3.57667	0.271539		-2.05417	0.5125		-0.0233333	0.479803		0.09	0.171885
	ZK1251.2	ins-7	0	0.188378		0.775	0.294863		1.92333	0.189033		1.59583	0.0375		-1.09	0.266229		-1.17667	0.443959
	C05A9.1	pgp-5	0	0.832291		0.208333	0.519882		-1.41	0.549303		-1.7875	0.4875		0.51	0.659116		-0.0766667	0.640217
	C09F12.1	clc-1	0	0.046398		0.275	0.319287		-2.15667	0.061101		-1.45417	0.2875		-0.823333	0.276064		-0.243333	0.117804
	C02F5.8	tsp-1	0	0.154335		0.275	0.488478		-1.42333	0.505481		-1.55417	0.1875		-1.95667	0.577437		-2.07667	0.09
	F40F8.7	pqm-1	0	0.269645		0.108333	0.443784		-0.61	0.444672		-0.5875	0.5875		-1.09	0.550545		-1.27667	0.441072
	F44G3.6	skr-3	0	0.254269		-0.125	0.280377		-0.11	0.221008		-0.854167	0.0125		-0.623333	0.351014		-0.876667	0.356978
	F55G11.5	dod-22	0	0.247628		2.44167	0.431084		-5.87667	1.66539		-6.82083	1.1125		0.443333	0.61904		0.623333	0.475967
	K08F4.7	gst-4	0	0.909021		0.31	0.728583		0.456667	0.464949		0.945833	0.6875		0.81	0.309103		0.656667	0.51174
	R03D7.6	gst-5	0	0.327342		0.341667	0.0763763		0.256667	0.355528		0.379167	0.0875		-0.19	0.328448		0.49	0.761716
	Y40D12A.2	Y40D12A.2	0	0.271697		0.175	0.277389		-2.54333	0.430968		-1.77083	0.1375		0.0433333	0.481191		0.69	0.0622718
	C49G7.5	C49G7.5	0	0.751249		-0.225	0.332916		-1.71	1.8745		3.9625	0.7625		-0.75	0.490748		-0.543333	1.42836
	C55B7.4	dod-12; acdh-1	0	0.454663		1.22917	1.69812		0.6875	0.32909		1.76	0.36		-0.7125	1.21244		-0.6125	1.38564
	F21F8.4	F21F8.4	0	0.37333		1.475	0.132288		-3.01	0.371124		-2.9875	0.2875		1.44333	0.67494		2.89	0.688065
	F28A12.4	F28A12.4	0	0.790174		-0.22	1.32613		-2.01	0.421584		0.4625	0.5625		0.376667	0.646692		-0.71	1.0436
	C32H11.4	C32H11.4	0	0.158771		2.66	0.284312		-3.54333	0.193678		-2.4375	0.5375		0.643333	0.367257		-0.31	0.516172
	CD4.2	crn-2	0	0.318307		0.14	0.404489		1.42333	0.231805		1.04583	0.7125		0.01	0.640217		0.59	0.348154
	C41H7.7	clec-3	0	0.438986		0.408333	0.438115		-2.79	0.08		-2.1875	0.4875		0.0433333	0.328448		-1.37667	0.533739
	F27C8.4	spp-18	0	0.108972		-0.125	0.332916		-1.07667	0.298068		-0.7375	0.2625		-0.29	0.461988		-0.443333	0.422151
	F28F8.2	acs-2	0	0.286623		0.54	1.73518		0.223333	1.00441		0.829167	1.0375		-2.08	1.34631		-0.81	1.24454
	H22K11.1	asp-3	0	0.101036		-0.458333	0.428499		-1.74333	0.267416		-2.9375	1.4375		-0.256667	0.294184		-0.81	0.556267
	K08C7.5	fmo-2	0	0.833458		-0.391667	0.797043		-3.87667	0.219494		-2.65	0.76		-3.49	1.09812		-1.67667	0.935171
	Y54G2A.6	clec-85	0	0.219057		0.541667	0.217945		-6.14333	0.318957		-5.77083	0.6375		0.643333	0.232116		0.723333	0.0808977
	K08E7.7	cul-6	0	0.255359		0.775	0.540833		1.39	0.156205		1.2625	0.0625		-0.656667	0.38671		-0.543333	0.348154
	C23G10.11	C23G10.11	0	0.485269		2.54167	0.975107		-3.54333	0.761402		-2.32083	0.3125		-2.19	0.47876		0.423333	1.25627
	T10H4.12	cpr-3	0	0.123322		-0.158333	0.474634		-2.07667	0.293561		-1.6875	0.3125		-1.19	0.412836		-1.36667	0.185592
	C47B2.8	prx-11	0	0.259139		0.241667	0.551009		-0.11	0.43762		0.0458333	0.2125		-0.19	0.261173		0.39	0.335476
